# Supplementary material for: Effect of cation substitution on structural transition: synthesis, characterization and theoretical studies of NaCa4B3O9, NaCaBO3, NaSrBO3and Li4CaB2O6
Source: Royal Society of Chemistry journal article supplement (doi:10.1039/c5cp04420k), 2015-01-01
Supplement: c5cp04420k2.pdf [file c5cp04420k2.pdf]

## Supporting Information

Effect of Cation Substitution on Structural Transition: Synthesis,  
Characterization and Theoretical Studies of  $\text{NaCa}_4\text{B}_3\text{O}_9$ ,  $\text{NaCaBO}_3$ ,  
 $\text{NaSrBO}_3$  and  $\text{Li}_4\text{CaB}_2\text{O}_6$

Yun Yang,<sup>a</sup> Xin Su,<sup>a,b</sup> Shilie Pan,<sup>\*a</sup> and Zhihua Yang<sup>a</sup>

<sup>a</sup> *Key Laboratory of Functional Materials and Devices for Special Environments of  
CAS, Xinjiang Technical Institute of Physics & Chemistry of CAS, Xinjiang Key  
Laboratory of Electronic Information Materials and Devices, 40-1 South Beijing  
Road, Urumqi 830011, China ;*

<sup>b</sup> *University of the Chinese Academy of Sciences, Beijing 100039, China*

\*To whom correspondence should be addressed. Phone: (+86)991-3674558.

Fax: (+86)991-3838957. E-mail: slpan@ms.xjb.ac.cn (S. Pan).

**Fig. S1.** X-ray powder diffraction pattern of compounds about experimental and calculated XRD patterns and sample after melting XRD patterns: (a)  $\text{NaCa}_4\text{B}_3\text{O}_9$  (b)  $\text{NaCaBO}_3$  (c)  $\text{NaSrBO}_3$  and (d)  $\text{Li}_4\text{CaB}_2\text{O}_6$ .

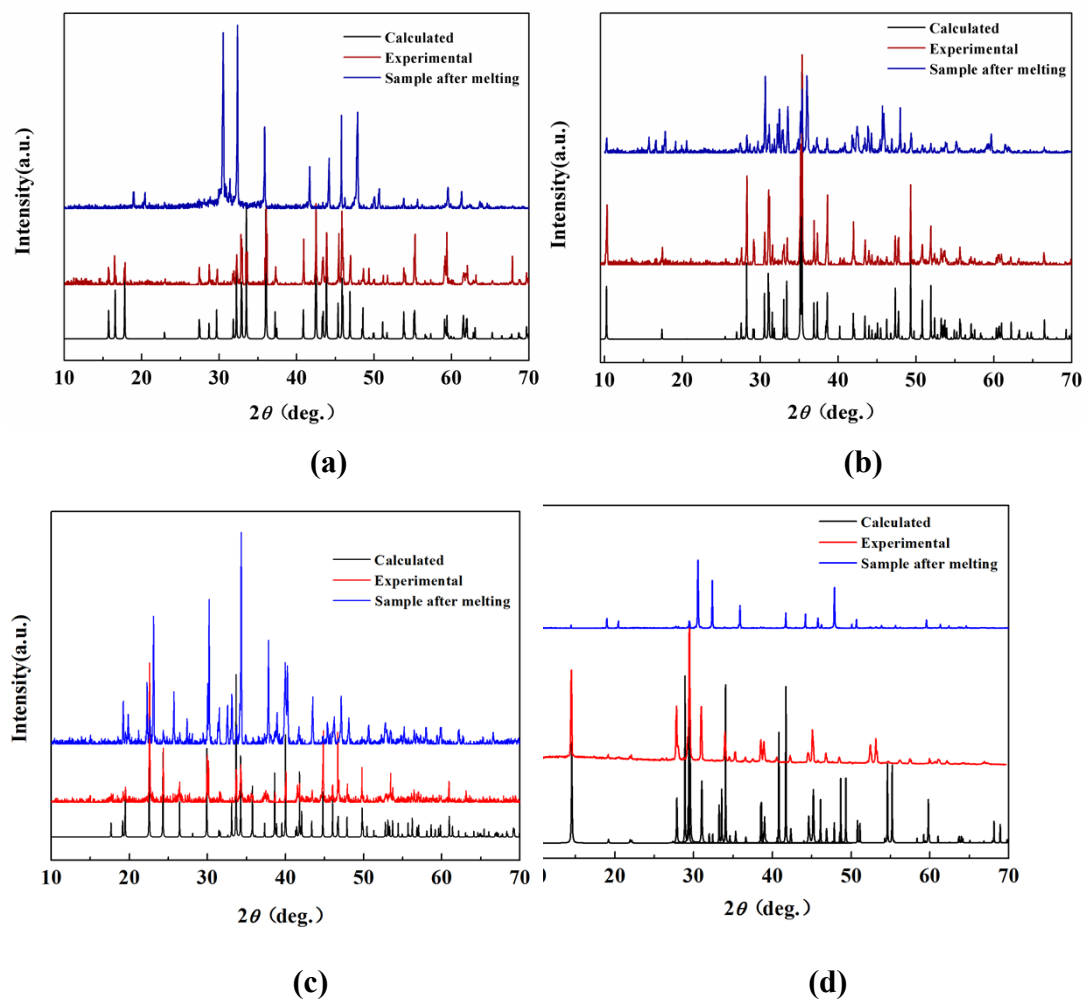

**Fig. S2.** The crystal structure of  $\text{NaCa}_4\text{B}_3\text{O}_9$ . (a) The cation-coordinated environments. (b) The Na-O polyhedra are interconnected via sharing the O atoms into a 1D chain along the  $c$  axis. (c) 1D Na-O polyhedra chains are bridged by the B(2) atoms forming a 3D framework. (d) The  $\text{Ca}(1)\text{O}_8$ ,  $\text{Ca}(2)\text{O}_9$  and  $\text{Ca}(3)\text{O}_8$  polyhedra are interconnected by shared oxygen atoms forming the 3D framework.

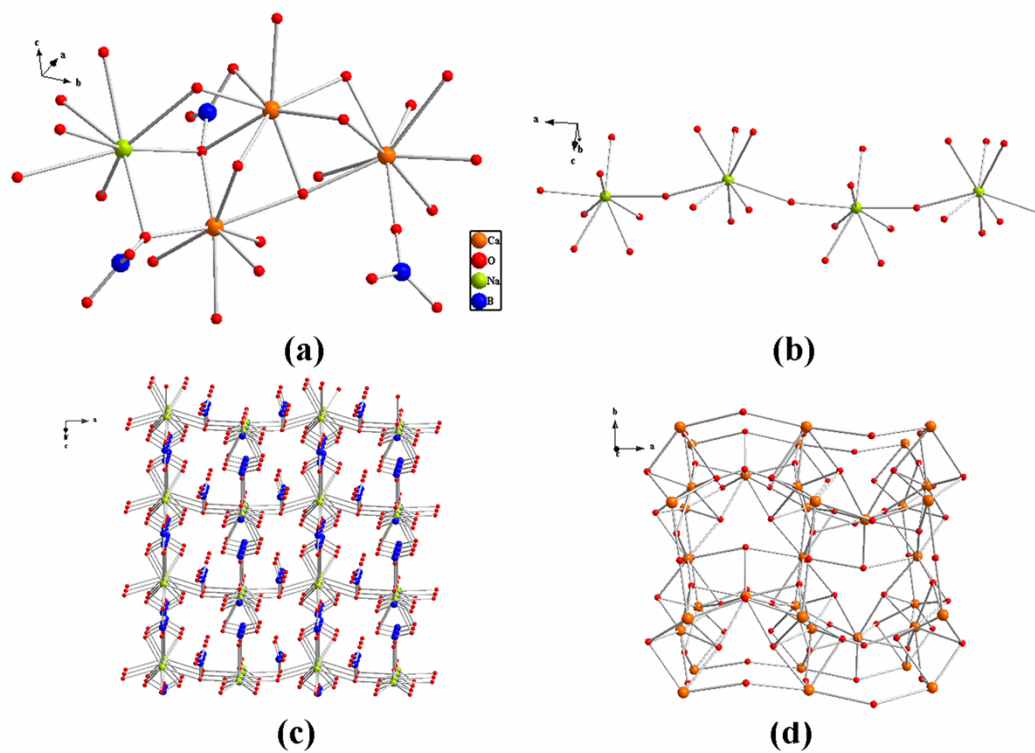

**Fig. S3.** The crystal structure of NaCaBO<sub>3</sub> (a) The cation-coordinated environments. (b) The CaO<sub>6</sub> polyhedra are interconnected via sharing edges into a 1D chain along the *c* axis (c) Ca<sup>2+</sup> cations and Na<sup>+</sup> cations share the same sites and Ca/NaO<sub>7</sub> polyhedra are interconnected via sharing O atoms and edges into a 3D framework along the *c* axis. (d) The Na-O polyhedra are interconnected via sharing the O atoms into 1D channel along *a* axis.

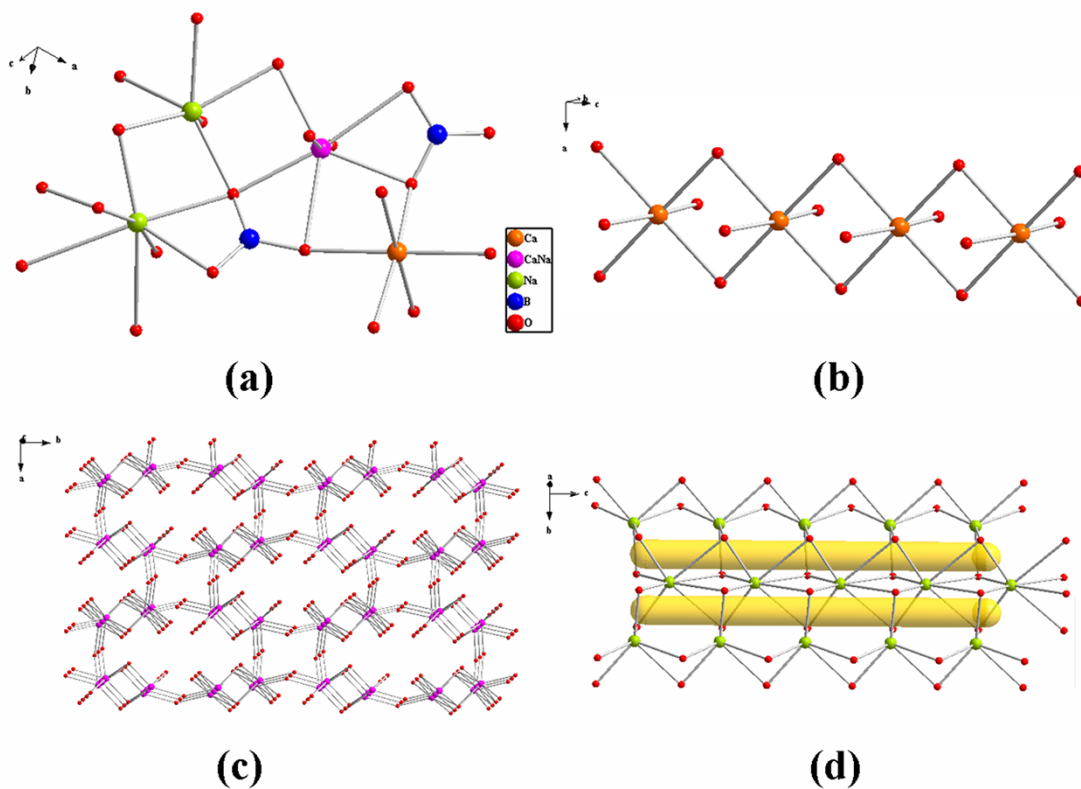

**Fig. S4.** The crystal structure of NaSrBO<sub>3</sub> (a) The cation-coordinated environments. (b) Isolated BO<sub>3</sub> structural building unit along the *c* axis (c) Na<sup>2+</sup> cations and BO<sub>3</sub> are interconnected via sharing O atoms and edges into a 3D framework along the *c* axis. (d) The Sr-O polyhedra are interconnected via sharing the O atoms into a 3D framework along the *c* axis.

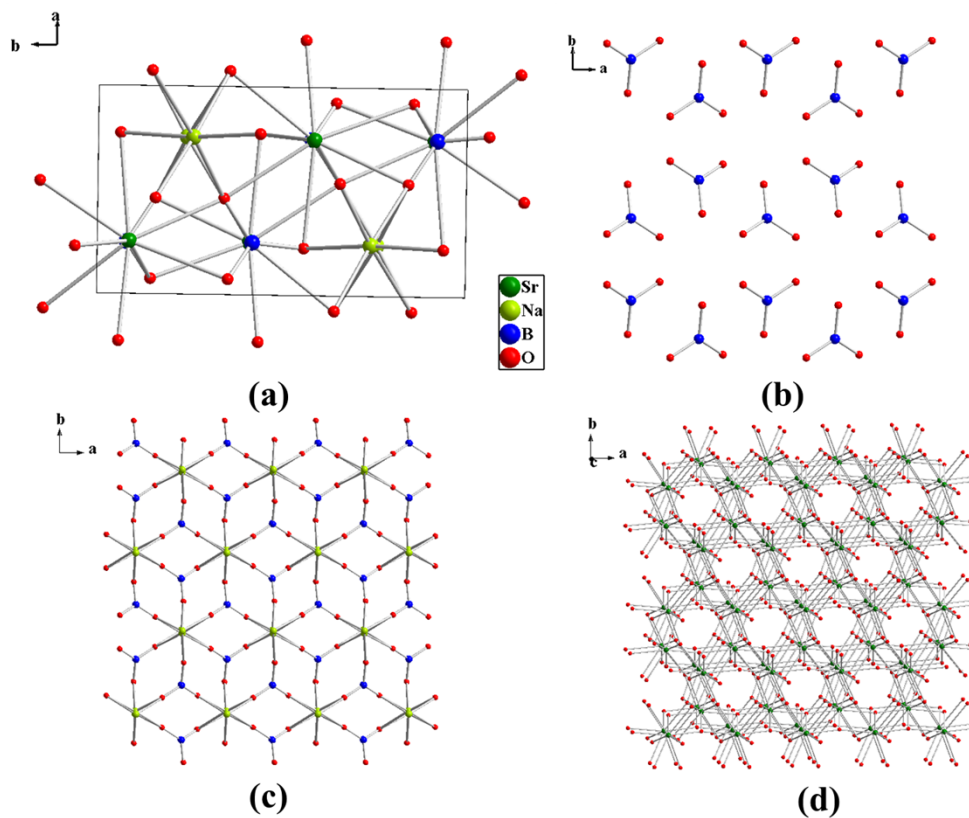

**Fig. S5.** The crystal structure of  $\text{Li}_4\text{CaB}_2\text{O}_6$  (a) The cation-coordinated environments. (b) Isolated  $\text{BO}_3$  structural building unit along the  $c$  axis (c)  $\text{Li}^+$  cations and  $\text{BO}_3$  are interconnected via sharing O atoms and edges into a 3D framework along the  $c$  axis. (d)  $\text{Ca}^{2+}$  cations and  $\text{BO}_3$  are interconnected via sharing O atoms and edges into a 3D framework along the  $c$  axis.

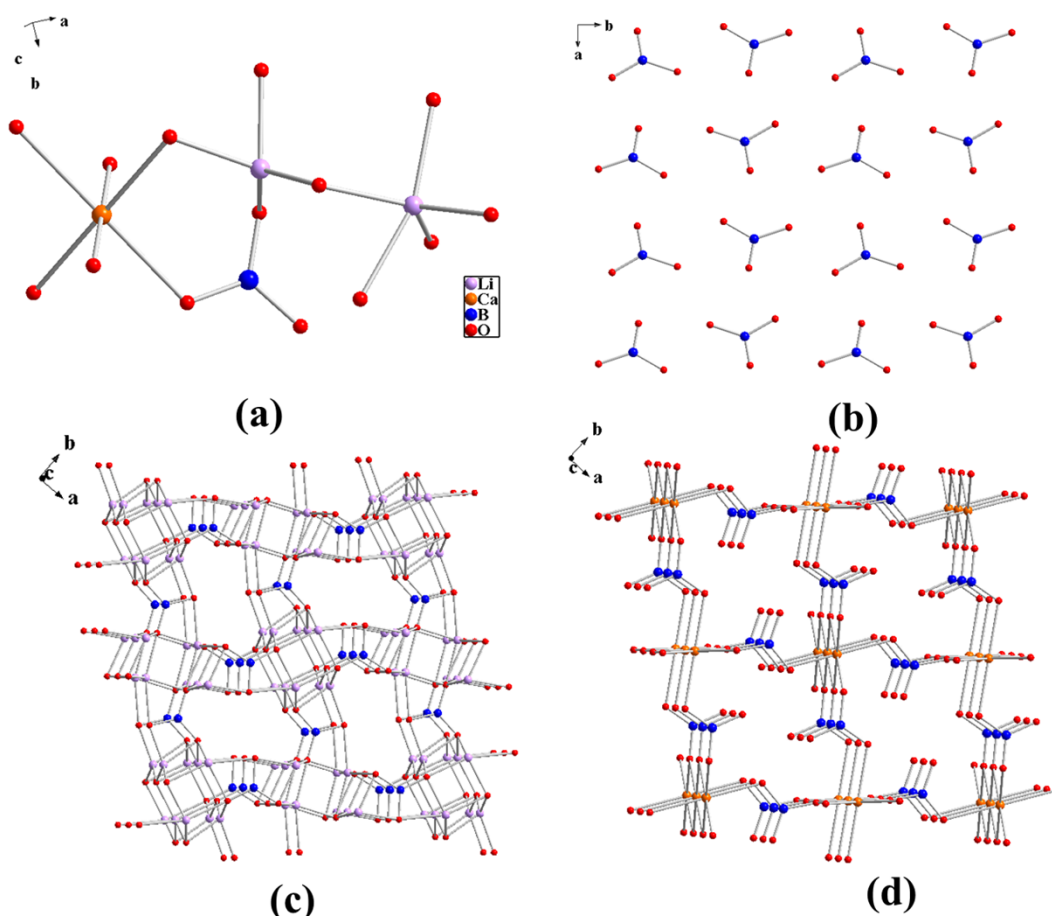

**Fig. S6.** The diffuse reflectance spectra for (a)  $\text{NaCaBO}_3$  (b)  $\text{NaSrBO}_3$  (c)  $\text{Li}_4\text{CaB}_2\text{O}_6$ .

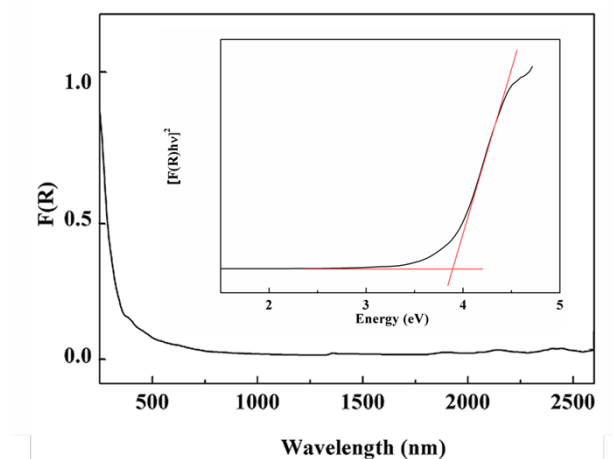

(a)

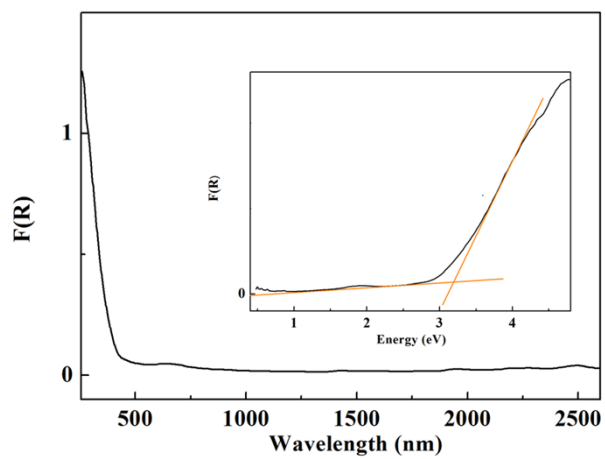

(b)

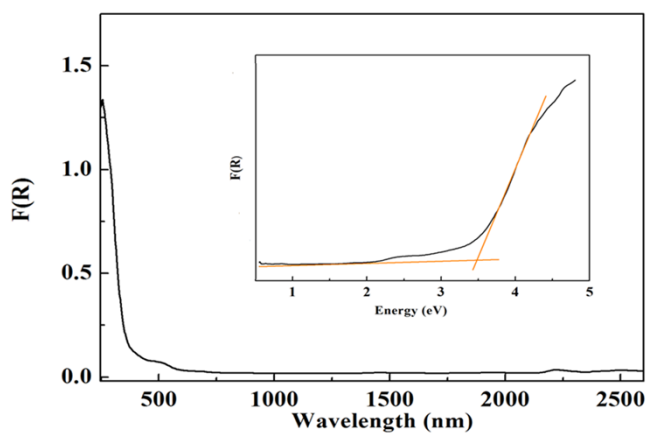

(c)

**Fig. S7.** The calculated band structures of (a)  $\text{NaCa}_4\text{B}_3\text{O}_9$  (b)  $\text{NaCaBO}_3$  (c)  $\text{KCa}_4\text{B}_3\text{O}_9$  and (d)  $\text{KSr}_4\text{B}_3\text{O}_9$ .

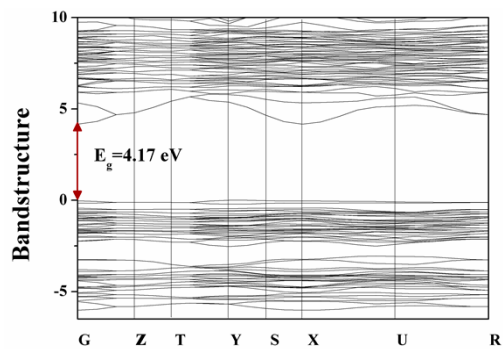

(a)

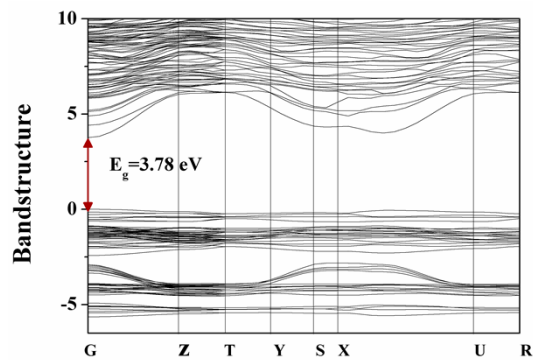

(b)

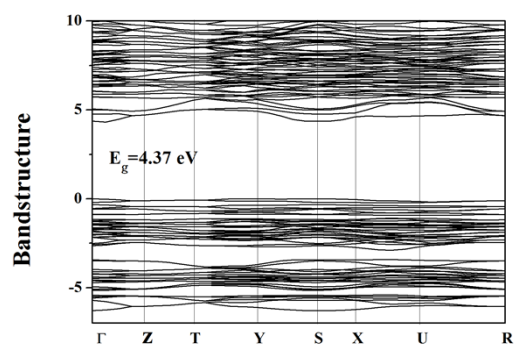

(c)

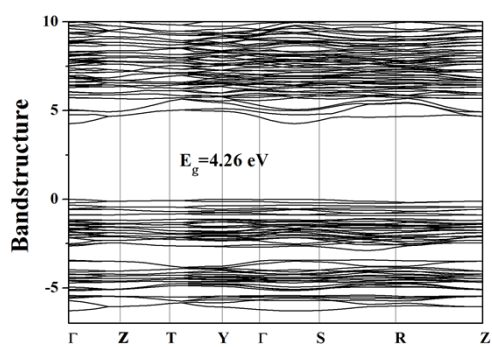

(d)



**Fig. S8.** The total and partial densities of states of (a)  $\text{KCa}_4\text{B}_3\text{O}_9$  and (b)  $\text{KSr}_4\text{B}_3\text{O}_9$ .

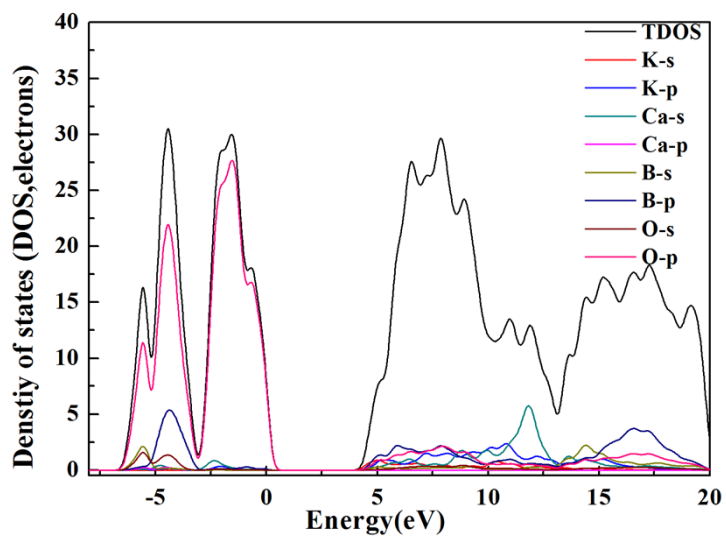

(a)

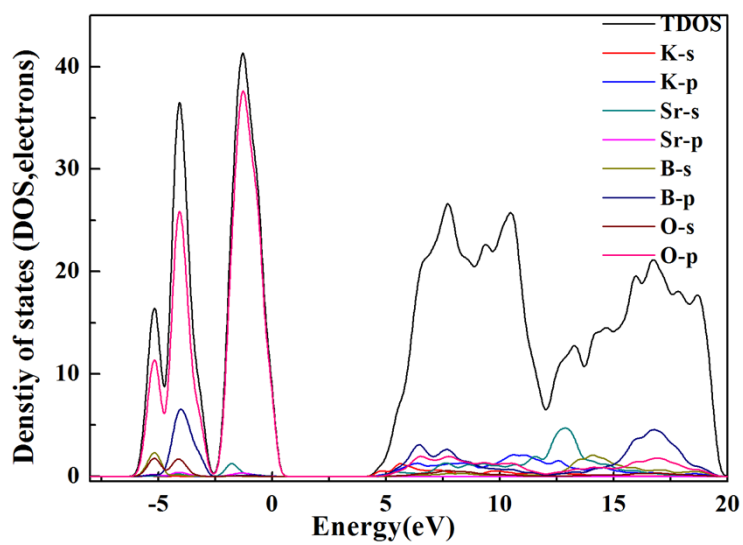

(b)

**Fig. S9.** SHG intensities of  $\text{NaCa}_4\text{B}_3\text{O}_9$  with commercial KDP as a reference: Oscilloscope traces for the powder of KDP and  $\text{NaCa}_4\text{B}_3\text{O}_9$ .

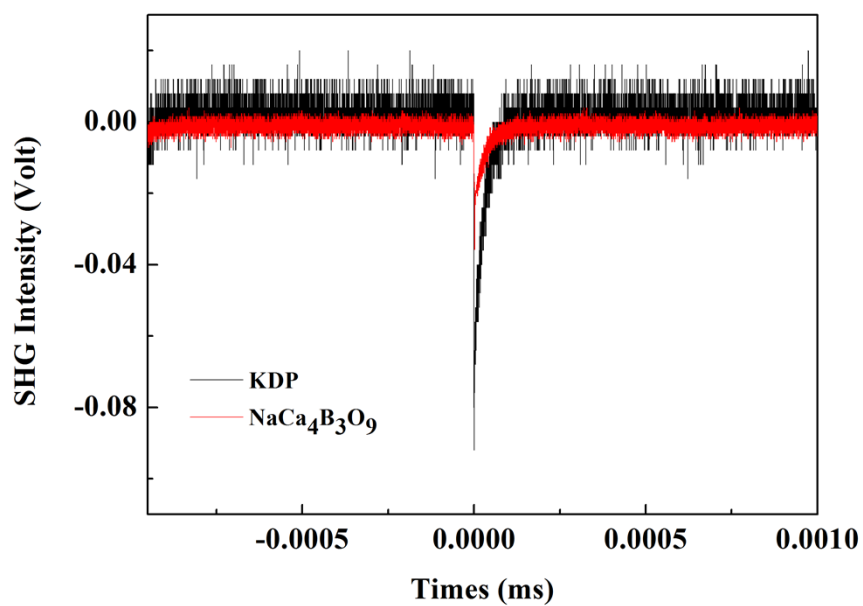

**Fig. S10.** The wavelength dependence of refractive indices where the direction of the electric field parallels to  $a$ -axis ( $n_x$ ) or  $c$ -axis ( $n_z$ ) of (a)  $\text{KCa}_4\text{B}_3\text{O}_9$  and (b)  $\text{KSr}_4\text{B}_3\text{O}_9$ .

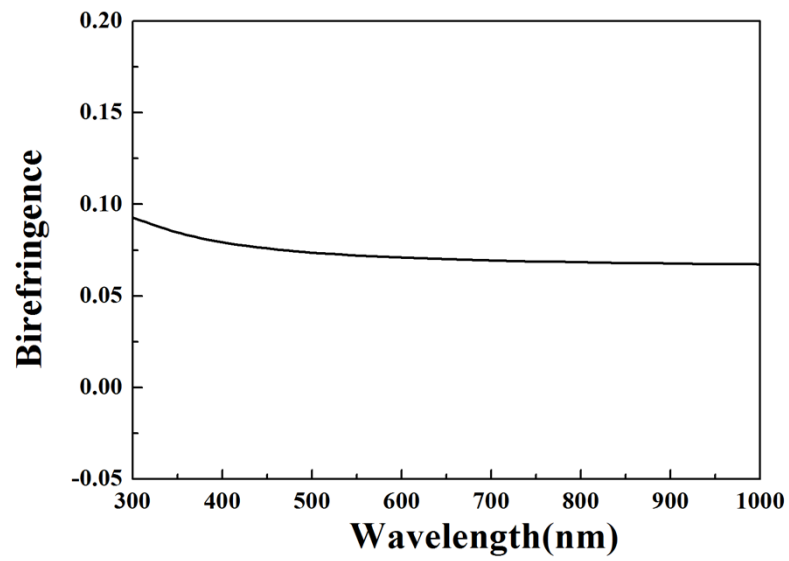

(a)

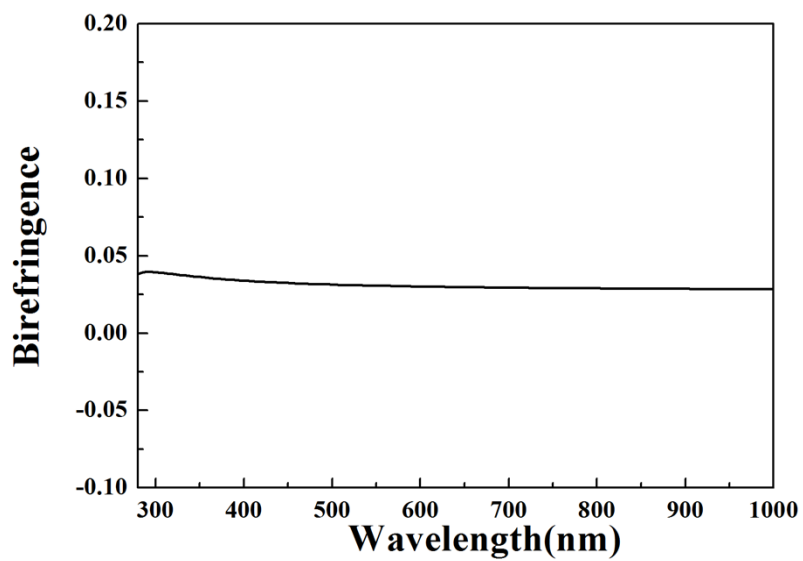

(b)

**Table S1.** Atomic coordinates ( $\times 10^4$ ) and equivalent isotropic displacement parameters ( $\text{\AA}^2 \times 10^3$ ) for  $\text{NaCa}_4\text{B}_3\text{O}_9$ ,  $\text{NaCaBO}_3$ ,  $\text{NaSrBO}_3$  and  $\text{Li}_4\text{CaB}_2\text{O}_6$ .

| <b><math>\text{NaCa}_4\text{BO}_9</math></b> |                  |          |          |          |                 |
|----------------------------------------------|------------------|----------|----------|----------|-----------------|
| Atom                                         | Wyckoff position | x        | y        | z        | $U_{\text{eq}}$ |
| Ca(1)                                        | 8c               | 9724(1)  | 7141(1)  | 11087(1) | 8(1)            |
| Ca(2)                                        | 4a               | 0        | 0        | 9669(1)  | 12(1)           |
| Ca(3)                                        | 4b               | 7500     | 6498(1)  | 7422(1)  | 8(1)            |
| Na(1)                                        | 4b               | 7500     | 4249(2)  | 385(3)   | 33(1)           |
| B(1)                                         | 4b               | 7500     | 6715(4)  | 3161(7)  | 9(1)            |
| B(2)                                         | 4b               | 7500     | 3779(4)  | 4541(8)  | 12(1)           |
| B(3)                                         | 4a               | 0        | 0        | 3924(7)  | 9(1)            |
| O(1)                                         | 4b               | 7500     | 6419(2)  | 1127(5)  | 12(1)           |
| O(2)                                         | 8c               | 8611(2)  | 6906(2)  | 4217(3)  | 12(1)           |
| O(3)                                         | 8c               | 8611(2)  | 8385(2)  | 8622(3)  | 12(1)           |
| O(4)                                         | 4a               | 0        | 0        | 6021(6)  | 16(1)           |
| O(5)                                         | 8c               | 9714(2)  | 1021(2)  | 2877(3)  | 10(1)           |
| O(6)                                         | 4b               | 7500     | 4555(3)  | 6124(5)  | 23(1)           |
| <b><math>\text{NaCaBO}_3</math></b>          |                  |          |          |          |                 |
| Atom                                         | Wyckoff position | x        | y        | z        | $U_{\text{eq}}$ |
| Ca(1)                                        | 2a               | 7500     | 7500     | 4664(2)  | 12(1)           |
| Ca(2)                                        | 8g               | 5337(1)  | 5985(1)  | 7620(1)  | 11(1)           |
| Na(1)                                        | 8g               | 5337(1)  | 5985(1)  | 7620(1)  | 11(1)           |
| Na(2)                                        | 2b               | 2500     | 7500     | 6213(5)  | 19(1)           |
| Na(3)                                        | 4e               | 2500     | 5829(1)  | 2076(3)  | 16(1)           |
| B(1)                                         | 4e               | 7500     | 5399(2)  | 3206(7)  | 9(1)            |
| B(2)                                         | 4f               | 4737(3)  | 7500     | 1585(8)  | 11(1)           |
| O(1)                                         | 8g               | 3680(1)  | 4973(1)  | 7643(3)  | 15(1)           |
| O(2)                                         | 8g               | 4166(1)  | 6750(1)  | 2513(4)  | 19(1)           |
| O(3)                                         | 4f               | 5914(2)  | 7500     | -387(5)  | 14(1)           |
| O(4)                                         | 4e               | 7500     | 6121(1)  | 5274(5)  | 13(1)           |
| <b><math>\text{NaSrBO}_3</math></b>          |                  |          |          |          |                 |
| Atom                                         | Wyckoff position | x        | y        | z        | $U_{\text{eq}}$ |
| Sr(1)                                        | 4e               | 7466(1)  | 862(1)   | 2178(1)  | 9(1)            |
| Na(1)                                        | 4e               | 7554(4)  | -2582(2) | 321(3)   | 13(1)           |
| B(1)                                         | 4e               | 7493(11) | 4204(6)  | 2403(9)  | 9(1)            |
| O(1)                                         | 4e               | 7738(7)  | -605(4)  | -1890(6) | 11(1)           |

|                                                   |                     |         |          |         |                 |
|---------------------------------------------------|---------------------|---------|----------|---------|-----------------|
| O(2)                                              | 4e                  | 9259(7) | 3553(4)  | 1350(6) | 10(1)           |
| O(3)                                              | 4e                  | 4615(7) | -1571(4) | 2166(6) | 12(1)           |
| <b>Li<sub>4</sub>CaB<sub>2</sub>O<sub>6</sub></b> |                     |         |          |         |                 |
| Atom                                              | Wyckoff<br>position | x       | y        | z       | U <sub>eq</sub> |
| Li(1)                                             | 4g                  | 3023(5) | -128(5)  | 5000    | 14(1)           |
| Li(2)                                             | 4g                  | 5487(5) | 1690(6)  | 0       | 16(1)           |
| Ca(1)                                             | 2a                  | 0       | 0        | 10000   | 9(1)            |
| B(1)                                              | 4g                  | 2909(3) | 2290(3)  | 10000   | 9(1)            |
| O(1)                                              | 4g                  | 1424(2) | 2525(2)  | 10000   | 11(1)           |
| O(2)                                              | 4g                  | 3508(2) | 733(2)   | 10000   | 12(1)           |
| O(3)                                              | 4g                  | 1190(2) | -1343(2) | 5000    | 10(1)           |

U<sub>eq</sub> is defined as one-third of the trace of the orthogonalized U<sub>ij</sub> tensor.

**Table S2.** Selected bond distances (Å) and angles (deg) for NaCa<sub>4</sub>B<sub>3</sub>O<sub>9</sub>, NaCaBO<sub>3</sub>, NaSrBO<sub>3</sub> and Li<sub>4</sub>CaB<sub>2</sub>O<sub>6</sub>.

| <b>NaCa<sub>4</sub>B<sub>3</sub>O<sub>9</sub></b> |            |                       |            |
|---------------------------------------------------|------------|-----------------------|------------|
| Ca(1)-O(1)                                        | 2.5113(11) | B(1)-O(1)             | 1.360(6)   |
| Ca(1)-O(2)#1                                      | 2.4060(19) | B(1)-O(2)             | 1.387(3)   |
| Ca(1)-O(4)#2                                      | 2.4298(7)  | B(1)-O(2)#12          | 1.387(3)   |
| Ca(1)-O(3)                                        | 2.435(2)   | B(2)-O(6)             | 1.349(6)   |
| Ca(1)-O(3)#5                                      | 2.4940(19) | B(2)-O(3)#11          | 1.400(3)   |
| Ca(1)-O(5)#3                                      | 2.433(2)   | B(2)-O(3)#3           | 1.400(3)   |
| Ca(1)-O(5)#4                                      | 2.448(2)   | B(3)-O(4)             | 1.360(6)   |
| Ca(1)-O(2)                                        | 2.367(2)   | B(3)-O(5)#16          | 1.370(3)   |
| Ca(2)-O(4)                                        | 2.365(4)   | B(3)-O(5)#10          | 1.370(3)   |
| Ca(2)-O(5)                                        | 2.396(2)   | Na(1)-O(1)            | 2.491(4)   |
| Ca(2)-O(5)#4                                      | 2.396(2)   | Na(1)-O(6)            | 2.784(4)   |
| Ca(2)-O(3)                                        | 2.4445(18) | Na(1)-O(3)#2          | 2.600(3)   |
| Ca(2)-O(3)#4                                      | 2.4445(18) | Na(1)-O(3)#14         | 2.600(3)   |
| Ca(2)-O(2)#7                                      | 2.6261(19) | Na(1)-O(4)#2          | 2.8323(11) |
| Ca(2)-O(2)#1                                      | 2.6261(19) | Na(1)-O(4)#15         | 2.8323(11) |
| Ca(2)-O(6)#5                                      | 2.8772(15) | Na(1)-O(2)#11         | 2.992(3)   |
| Ca(2)-O(6)#6                                      | 2.8772(15) | Na(1)-O(2)#3          | 2.992(3)   |
| Ca(3)-O(6)                                        | 2.345(3)   | Ca(3)-O(5)#11         | 2.4443(17) |
| Ca(3)-O(1)                                        | 2.404(3)   | Ca(3)-O(5)#3          | 2.4443(17) |
| Ca(3)-O(2)#9                                      | 2.437(2)   | Ca(3)-O(3)            | 2.5552(19) |
| Ca(3)-O(2)#10                                     | 2.437(2)   | Ca(3)-O(3)#12         | 2.5552(19) |
| O(2)-Ca(1)-O(2)#1                                 | 148.58(7)  | O(1)-Na(1)-O(3)#2     | 102.22(10) |
| O(2)#1-Ca(1)-O(4)#2                               | 110.13(7)  | O(1)-Na(1)-O(3)#14    | 102.22(10) |
| O(2)-Ca(1)-O(5)#3                                 | 132.33(7)  | O(3)#2-Na(1)-O(3)#14  | 54.32(9)   |
| O(2)-Ca(1)-O(4)#2                                 | 88.00(9)   | O(1)-Na(1)-O(6)       | 94.03(11)  |
| O(2)#1-Ca(1)-O(5)#3                               | 78.66(7)   | O(3)#2-Na(1)-O(6)     | 147.91(8)  |
| O(4)#2-Ca(1)-O(5)#3                               | 58.08(10)  | O(3)#14-Na(1)-O(6)    | 147.91(8)  |
| O(2)-Ca(1)-O(3)                                   | 112.45(6)  | O(1)-Na(1)-O(4)#2     | 71.27(4)   |
| O(2)#1-Ca(1)-O(3)                                 | 76.92(6)   | O(3)#2-Na(1)-O(4)#2   | 64.13(7)   |
| O(4)#2-Ca(1)-O(3)                                 | 128.24(9)  | O(3)#14-Na(1)-O(4)#2  | 115.14(10) |
| O(5)#3-Ca(1)-O(3)                                 | 74.63(7)   | O(6)-Na(1)-O(4)#2     | 96.17(8)   |
| O(2)-Ca(1)-O(5)#4                                 | 79.11(7)   | O(1)-Na(1)-O(4)#15    | 71.27(4)   |
| O(2)#1-Ca(1)-O(5)#4                               | 71.34(7)   | O(3)#2-Na(1)-O(4)#15  | 115.14(10) |
| O(4)#2-Ca(1)-O(5)#4                               | 144.84(9)  | O(3)#14-Na(1)-O(4)#15 | 64.13(7)   |
| O(5)#3-Ca(1)-O(5)#4                               | 147.64(7)  | O(6)-Na(1)-O(4)#15    | 96.17(8)   |
| O(3)-Ca(1)-O(5)#4                                 | 86.82(7)   | O(4)#2-Na(1)-O(4)#15  | 141.20(10) |
| O(2)-Ca(1)-O(3)#5                                 | 76.51(6)   | O(1)-Na(1)-O(2)#11    | 156.14(4)  |
| O(2)#1-Ca(1)-O(3)#5                               | 84.84(7)   | O(3)#2-Na(1)-O(2)#11  | 93.16(8)   |
| O(4)#2-Ca(1)-O(3)#5                               | 71.89(8)   | O(3)#14-Na(1)-O(2)#11 | 72.10(7)   |
| O(5)#3-Ca(1)-O(3)#5                               | 116.32(7)  | O(6)-Na(1)-O(2)#11    | 81.83(9)   |
| O(3)-Ca(1)-O(3)#5                                 | 156.56(2)  | O(4)#2-Na(1)-O(2)#11  | 132.43(7)  |
| O(5)#4-Ca(1)-O(3)#5                               | 73.33(6)   | O(4)#15-Na(1)-O(2)#11 | 85.75(5)   |
| O(2)-Ca(1)-O(1)                                   | 58.65(8)   | O(1)-Na(1)-O(2)#3     | 156.14(4)  |

|                     |            |                       |            |
|---------------------|------------|-----------------------|------------|
| O(2)#1-Ca(1)-O(1)   | 148.15(9)  | O(3)#2-Na(1)-O(2)#3   | 72.10(7)   |
| O(4)#2-Ca(1)-O(1)   | 78.11(6)   | O(3)#14-Na(1)-O(2)#3  | 93.16(8)   |
| O(5)#3-Ca(1)-O(1)   | 80.65(8)   | O(6)-Na(1)-O(2)#3     | 81.83(9)   |
| O(3)-Ca(1)-O(1)     | 74.41(8)   | O(4)#2-Na(1)-O(2)#3   | 85.75(5)   |
| O(5)#4-Ca(1)-O(1)   | 120.05(8)  | O(4)#15-Na(1)-O(2)#3  | 132.43(7)  |
| O(3)#5-Ca(1)-O(1)   | 126.26(8)  | O(2)#11-Na(1)-O(2)#3  | 46.77(8)   |
| O(4)-Ca(2)-O(5)     | 150.22(5)  | O(6)-B(2)-O(3)#11     | 121.97(18) |
| O(4)-Ca(2)-O(5)#4   | 150.22(5)  | O(6)-B(2)-O(3)#3      | 121.97(18) |
| O(5)-Ca(2)-O(5)#4   | 59.56(10)  | O(3)#11-B(2)-O(3)#3   | 115.9(4)   |
| O(4)-Ca(2)-O(3)     | 73.87(5)   | O(1)-B(1)-O(2)        | 121.08(18) |
| O(5)-Ca(2)-O(3)     | 121.40(7)  | O(1)-B(1)-O(2)#12     | 121.08(18) |
| O(5)#4-Ca(2)-O(3)   | 87.77(7)   | O(2)-B(1)-O(2)#12     | 117.7(4)   |
| O(4)-Ca(2)-O(3)#4   | 73.87(5)   | O(4)-B(3)-O(5)#16     | 119.7(2)   |
| O(5)-Ca(2)-O(3)#4   | 87.77(7)   | O(4)-B(3)-O(5)#10     | 119.7(2)   |
| O(5)#4-Ca(2)-O(3)#4 | 121.40(7)  | O(5)#16-B(3)-O(5)#10  | 120.6(4)   |
| O(5)-Ca(2)-O(2)#7   | 68.44(6)   | O(1)-Ca(3)-O(2)#9     | 149.21(5)  |
| O(5)#4-Ca(2)-O(2)#7 | 124.15(7)  | O(6)-Ca(3)-O(2)#10    | 82.53(9)   |
| O(3)-Ca(2)-O(2)#7   | 103.55(6)  | O(1)-Ca(3)-O(2)#10    | 149.21(5)  |
| O(3)#4-Ca(2)-O(2)#7 | 72.76(6)   | O(2)#9-Ca(3)-O(2)#10  | 58.33(8)   |
| O(4)-Ca(2)-O(2)#1   | 83.59(5)   | O(6)-Ca(3)-O(5)#11    | 80.69(5)   |
| O(5)-Ca(2)-O(2)#1   | 124.15(7)  | O(1)-Ca(3)-O(5)#11    | 82.60(6)   |
| O(5)#4-Ca(2)-O(2)#1 | 68.44(6)   | O(2)#9-Ca(3)-O(5)#11  | 70.89(7)   |
| O(3)-Ca(2)-O(2)#1   | 72.76(6)   | O(2)#10-Ca(3)-O(5)#11 | 128.03(7)  |
| O(3)#4-Ca(2)-O(2)#1 | 103.55(6)  | O(6)-Ca(3)-O(5)#3     | 80.69(5)   |
| O(2)#7-Ca(2)-O(2)#1 | 167.18(10) | O(1)-Ca(3)-O(5)#3     | 82.60(6)   |
| O(4)-Ca(2)-O(6)#5   | 109.15(7)  | O(2)#9-Ca(3)-O(5)#3   | 128.03(7)  |
| O(5)-Ca(2)-O(6)#5   | 75.52(8)   | O(2)#10-Ca(3)-O(5)#3  | 70.89(7)   |
| O(5)#4-Ca(2)-O(6)#5 | 71.38(7)   | O(5)#11-Ca(3)-O(5)#3  | 150.96(10) |
| O(3)-Ca(2)-O(6)#5   | 141.68(7)  | O(6)-Ca(3)-O(3)       | 152.31(4)  |
| O(3)#4-Ca(2)-O(6)#5 | 52.96(7)   | O(1)-Ca(3)-O(3)       | 74.13(8)   |
| O(2)#7-Ca(2)-O(6)#5 | 114.77(7)  | O(2)#9-Ca(3)-O(3)     | 109.22(7)  |
| O(2)#1-Ca(2)-O(6)#5 | 69.77(7)   | O(2)#10-Ca(3)-O(3)    | 82.91(7)   |
| B(3)#8-Ca(2)-O(6)#5 | 70.85(7)   | O(5)#11-Ca(3)-O(3)    | 126.56(7)  |
| O(4)-Ca(2)-O(6)#6   | 109.15(7)  | O(5)#3-Ca(3)-O(3)     | 72.32(6)   |
| O(5)-Ca(2)-O(6)#6   | 71.38(7)   | O(6)-Ca(3)-O(3)#12    | 152.31(4)  |
| O(5)#4-Ca(2)-O(6)#6 | 75.52(8)   | O(1)-Ca(3)-O(3)#12    | 74.13(8)   |
| O(3)-Ca(2)-O(6)#6   | 52.96(7)   | O(2)#9-Ca(3)-O(3)#12  | 82.91(7)   |
| O(3)#4-Ca(2)-O(6)#6 | 141.68(7)  | O(2)#10-Ca(3)-O(3)#12 | 109.22(7)  |
| O(2)#7-Ca(2)-O(6)#6 | 69.77(7)   | O(5)#11-Ca(3)-O(3)#12 | 72.32(6)   |
| O(2)#1-Ca(2)-O(6)#6 | 114.77(7)  | O(5)#3-Ca(3)-O(3)#12  | 126.56(7)  |
| O(6)#5-Ca(2)-O(6)#6 | 141.71(14) | O(3)-Ca(3)-O(3)#12    | 55.36(8)   |

Note. Symmetry transformations used to generate equivalent atoms:

|                      |                        |                  |
|----------------------|------------------------|------------------|
| #1 -x+2,-y+3/2,z-1/2 | #2 x,y-1/2,z+1/2       | #3 x,y-1/2,z-1/2 |
| #4 -x+2,-y+2,z       | #5 -x+2,-y+3/2,z+1/2   | #6 x,y+1/2,z+1/2 |
| #7 x,y+1/2,z-1/2     | #8 x,y,z+1             | #9 -x+3/2,y,z-1  |
| #10 x,y,z-1          | #11 -x+3/2,y-1/2,z-1/2 | #12 -x+3/2,y,z   |

#13 x-1/2,-y+3/2,z-1/2

#14 -x+3/2,y-1/2,z+1/2

#15 x-1/2,-y+3/2,z+1/2

#16 -x+2,-y+2,z-1

**NaCaBO<sub>3</sub>**

|                       |            |                      |            |
|-----------------------|------------|----------------------|------------|
| Ca(1)-O(4)            | 2.2266(17) | Ca(2)-O(1)           | 2.3443(13) |
| Ca(1)-O(4)#1          | 2.2266(17) | Ca(2)-O(4)           | 2.3618(9)  |
| Ca(1)-O(3)#2          | 2.3654(18) | Ca(2)-O(2)           | 2.4189(14) |
| Ca(1)-O(3)#3          | 2.3654(18) | Ca(2)-O(1)#7         | 2.4708(14) |
| Ca(1)-O(3)            | 2.3915(18) | Ca(2)-O(2)#4         | 2.4723(15) |
| Ca(1)-O(3)#1          | 2.3915(18) | Ca(2)-O(1)#8         | 2.5973(13) |
| Na(2)-O(2)#9          | 2.4502(16) | Ca(2)-O(3)#3         | 2.6010(9)  |
| Na(2)-O(2)            | 2.4502(16) | B(1)-O(4)            | 1.368(3)   |
| Na(2)-O(2)#10         | 2.4502(16) | B(1)-O(1)#8          | 1.3750(18) |
| Na(2)-O(2)#11         | 2.4502(16) | B(1)-O(1)#14         | 1.3750(18) |
| Na(3)-O(2)            | 2.2570(15) | B(2)-O(2)            | 1.3785(19) |
| Na(3)-O(2)#9          | 2.2570(15) | B(2)-O(2)#10         | 1.3785(19) |
| Na(3)-O(1)#9          | 2.3945(15) | B(2)-O(3)#3          | 1.382(3)   |
| Na(3)-O(1)            | 2.3945(15) | O(4)-Ca(1)-O(3)      | 94.04(4)   |
| Na(3)-O(1)#3          | 2.6673(16) | O(4)#1-Ca(1)-O(3)    | 94.04(4)   |
| Na(3)-O(1)#13         | 2.6673(16) | O(3)#2-Ca(1)-O(3)    | 179.42(6)  |
| O(4)-Ca(1)-O(4)#1     | 169.02(10) | O(3)#3-Ca(1)-O(3)    | 94.37(6)   |
| O(4)-Ca(1)-O(3)#2     | 86.00(4)   | O(4)-Ca(1)-O(3)#1    | 94.04(4)   |
| O(4)#1-Ca(1)-O(3)#2   | 86.00(4)   | O(4)#1-Ca(1)-O(3)#1  | 94.04(4)   |
| O(4)-Ca(1)-O(3)#3     | 86.00(4)   | O(3)#2-Ca(1)-O(3)#1  | 94.37(6)   |
| O(4)#1-Ca(1)-O(3)#3   | 86.00(4)   | O(3)#3-Ca(1)-O(3)#1  | 179.42(6)  |
| O(3)#2-Ca(1)-O(3)#3   | 86.21(9)   | O(3)-Ca(1)-O(3)#1    | 85.05(8)   |
| O(1)-Ca(2)-O(4)       | 137.55(5)  | O(1)-Ca(2)-O(2)      | 89.73(5)   |
| O(4)-Ca(2)-O(2)       | 131.13(5)  | O(1)-Ca(2)-O(1)#7    | 81.81(5)   |
| O(4)-Ca(2)-O(1)#7     | 84.92(5)   | O(2)-Ca(2)-O(1)#7    | 92.56(5)   |
| O(1)-Ca(2)-O(2)#4     | 90.00(5)   | O(4)-Ca(2)-O(2)#4    | 98.87(5)   |
| O(2)-Ca(2)-O(2)#4     | 91.02(5)   | O(1)#7-Ca(2)-O(2)#4  | 171.04(5)  |
| O(1)-Ca(2)-O(1)#8     | 82.47(5)   | O(4)-Ca(2)-O(1)#8    | 56.63(5)   |
| O(2)-Ca(2)-O(1)#8     | 172.17(5)  | O(1)#7-Ca(2)-O(1)#8  | 86.99(5)   |
| O(2)#4-Ca(2)-O(1)#8   | 88.35(5)   | O(1)-Ca(2)-O(3)#3    | 144.28(5)  |
| O(4)-Ca(2)-O(3)#3     | 78.14(6)   | O(2)-Ca(2)-O(3)#3    | 56.40(5)   |
| O(1)#7-Ca(2)-O(3)#3   | 108.25(5)  | O(2)#4-Ca(2)-O(3)#3  | 80.55(5)   |
| O(1)#8-Ca(2)-O(3)#3   | 131.06(5)  | O(2)#9-Na(2)-O(2)    | 87.69(8)   |
| O(2)#9-Na(2)-O(2)#10  | 116.40(9)  | O(2)-Na(2)-O(2)#10   | 59.01(7)   |
| O(2)#9-Na(2)-O(2)#11  | 59.01(7)   | O(2)-Na(2)-O(2)#11   | 116.40(9)  |
| O(2)#10-Na(2)-O(2)#11 | 87.69(8)   | O(2)-Na(3)-O(2)#9    | 97.53(8)   |
| O(2)-Na(3)-O(1)#9     | 142.96(6)  | O(2)#9-Na(3)-O(1)#9  | 92.46(5)   |
| O(2)-Na(3)-O(1)       | 92.46(5)   | O(2)#9-Na(3)-O(1)    | 142.96(6)  |
| O(1)#9-Na(3)-O(1)     | 60.29(7)   | O(2)-Na(3)-O(1)#3    | 87.14(5)   |
| O(2)#9-Na(3)-O(1)#3   | 128.92(6)  | O(1)#9-Na(3)-O(1)#3  | 113.59(7)  |
| O(1)-Na(3)-O(1)#3     | 86.98(5)   | O(2)-Na(3)-O(1)#13   | 128.92(6)  |
| O(2)#9-Na(3)-O(1)#13  | 87.14(5)   | O(1)#9-Na(3)-O(1)#13 | 86.98(5)   |
| O(1)-Na(3)-O(1)#13    | 113.59(7)  | O(1)#3-Na(3)-O(1)#13 | 53.59(6)   |
| O(4)-B(1)-O(1)#8      | 118.87(11) | O(4)-B(1)-O(1)#14    | 118.87(11) |



|                     |            |                     |            |
|---------------------|------------|---------------------|------------|
| O(1)#8-B(1)-O(1)#14 | 122.0(2)   | O(2)-B(2)-O(2)#10   | 122.2(2)   |
| O(2)-B(2)-O(3)#3    | 118.92(12) | O(2)#10-B(2)-O(3)#3 | 118.92(12) |

Note. Symmetry transformations used to generate equivalent atoms:

|                        |                          |                           |
|------------------------|--------------------------|---------------------------|
| #1 $-x+3/2, -y+3/2, z$ | #2 $-x+3/2, -y+3/2, z+1$ | #3 $x, y, z+1$            |
| #4 $x, y, z-1$         | #5 $-x+3/2, -y+3/2, z-1$ | #6 $-x+3/2, y, z$         |
| #7 $-x+1, -y+1, -z+2$  | #8 $-x+1, -y+1, -z+1$    | #9 $-x+1/2, y, z$         |
| #10 $x, -y+3/2, z$     | #11 $-x+1/2, -y+3/2, z$  | #12 $-x+1/2, -y+3/2, z+1$ |
| #13 $-x+1/2, y, z+1$   | #14 $x+1/2, -y+1, -z+1$  | #15 $-x+3/2, y, z-1$      |
| #16 $x, -y+3/2, z+1$   | #17 $x, -y+3/2, z-1$     |                           |

### NaSrBO<sub>3</sub>

|                     |            |                     |            |
|---------------------|------------|---------------------|------------|
| Sr(1)-O(2)#1        | 2.596(4)   | Na(1)-O(1)          | 2.286(4)   |
| Sr(1)-O(1)#2        | 2.603(4)   | Na(1)-O(3)          | 2.289(4)   |
| Sr(1)-O(3)#3        | 2.685(4)   | Na(1)-O(2)#2        | 2.315(4)   |
| Sr(1)-O(3)          | 2.718(4)   | Na(1)-O(3)#8        | 2.374(4)   |
| Sr(1)-O(3)#4        | 2.745(4)   | Na(1)-O(1)#9        | 2.374(4)   |
| Sr(1)-O(2)          | 2.750(4)   | Na(1)-O(2)#5        | 2.608(4)   |
| Sr(1)-O(1)#4        | 2.754(4)   | B(1)-O(1)#1         | 1.366(7)   |
| Sr(1)-O(2)#5        | 2.800(4)   | B(1)-O(2)           | 1.371(7)   |
| Sr(1)-O(1)          | 2.848(4)   | B(1)-O(3)#3         | 1.396(7)   |
| O(2)#1-Sr(1)-O(1)#2 | 84.05(12)  | O(1)#2-Sr(1)-O(2)   | 72.09(11)  |
| O(2)#1-Sr(1)-O(3)#3 | 75.95(12)  | O(3)#3-Sr(1)-O(2)   | 52.43(12)  |
| O(1)#2-Sr(1)-O(3)#3 | 121.87(11) | O(3)-Sr(1)-O(2)     | 164.74(11) |
| O(2)#1-Sr(1)-O(3)   | 106.27(11) | O(3)#4-Sr(1)-O(2)   | 72.50(11)  |
| O(1)#2-Sr(1)-O(3)   | 118.59(12) | O(2)#1-Sr(1)-O(1)#4 | 105.30(11) |
| O(3)#3-Sr(1)-O(3)   | 119.33(5)  | O(1)#2-Sr(1)-O(1)#4 | 167.40(16) |
| O(2)#1-Sr(1)-O(3)#4 | 153.99(12) | O(3)#3-Sr(1)-O(1)#4 | 69.40(11)  |
| O(1)#2-Sr(1)-O(3)#4 | 100.59(12) | O(3)-Sr(1)-O(1)#4   | 51.17(11)  |
| O(3)#3-Sr(1)-O(3)#4 | 80.01(9)   | O(3)#4-Sr(1)-O(1)#4 | 74.79(11)  |
| O(3)-Sr(1)-O(3)#4   | 94.03(11)  | O(2)-Sr(1)-O(1)#4   | 116.50(11) |
| O(2)#1-Sr(1)-O(2)   | 84.93(9)   | O(2)#1-Sr(1)-O(2)#5 | 75.70(13)  |
| O(3)#3-Sr(1)-O(2)#5 | 151.56(11) | O(3)-Sr(1)-O(2)#5   | 71.42(12)  |
| O(3)#4-Sr(1)-O(2)#5 | 127.32(11) | O(1)#2-Sr(1)-O(2)#5 | 52.46(11)  |
| O(2)-Sr(1)-O(2)#5   | 122.32(6)  | O(3)-Sr(1)-O(1)     | 73.73(11)  |
| O(1)#4-Sr(1)-O(2)#5 | 120.92(11) | O(3)#4-Sr(1)-O(1)   | 49.94(11)  |
| O(2)#1-Sr(1)-O(1)   | 151.49(11) | O(2)-Sr(1)-O(1)     | 101.48(11) |
| O(1)#2-Sr(1)-O(1)   | 71.93(12)  | O(1)#4-Sr(1)-O(1)   | 96.66(10)  |
| O(3)#3-Sr(1)-O(1)   | 129.82(11) | O(2)#5-Sr(1)-O(1)   | 77.51(11)  |
| O(1)-Na(1)-O(3)     | 93.84(15)  | O(1)-Na(1)-O(2)#2   | 86.52(15)  |
| O(3)-Na(1)-O(2)#2   | 176.14(16) | O(1)-Na(1)-O(3)#8   | 83.35(15)  |
| O(3)-Na(1)-O(3)#8   | 97.03(18)  | O(1)-Na(1)-O(1)#9   | 170.43(18) |
| O(2)#2-Na(1)-O(3)#8 | 86.83(15)  | O(3)-Na(1)-O(1)#9   | 83.22(14)  |
| O(2)#2-Na(1)-O(1)#9 | 95.81(15)  | O(3)#8-Na(1)-O(1)#9 | 106.02(15) |
| O(1)-Na(1)-O(2)#5   | 92.27(15)  | O(3)-Na(1)-O(2)#5   | 81.99(15)  |

|                     |           |                     |            |
|---------------------|-----------|---------------------|------------|
| O(2)#2-Na(1)-O(2)#5 | 94.16(17) | O(3)#8-Na(1)-O(2)#5 | 175.45(15) |
| O(1)#9-Na(1)-O(2)#5 | 78.32(14) | O(1)#1-B(1)-O(2)    | 122.1(5)   |
| O(1)#1-B(1)-O(3)#3  | 117.5(5)  | O(2)-B(1)-O(3)#3    | 120.4(5)   |

Note. Symmetry transformations used to generate equivalent atoms:

|                           |                          |                          |
|---------------------------|--------------------------|--------------------------|
| #1 $x, -y+1/2, z+1/2$     | #2 $-x+2, -y, -z$        | #3 $-x+1, y+1/2, -z+1/2$ |
| #4 $-x+1, -y, -z$         | #5 $-x+2, y-1/2, -z+1/2$ | #6 $x, -y+1/2, z-1/2$    |
| #7 $-x+1, y-1/2, -z+1/2$  | #8 $x, -y-1/2, z-1/2$    | #9 $x, -y-1/2, z+1/2$    |
| #10 $-x+2, y+1/2, -z+1/2$ |                          |                          |

| <b>Li<sub>4</sub>CaB<sub>2</sub>O<sub>6</sub></b> |            |                       |            |
|---------------------------------------------------|------------|-----------------------|------------|
| Li(1)-O(2)                                        | 1.931(3)   | Ca(1)-O(3)#10         | 2.333(2)   |
| Li(1)-O(2)#1                                      | 1.931(3)   | Ca(1)-O(3)#11         | 2.333(2)   |
| Li(1)-O(3)                                        | 1.965(5)   | Ca(1)-O(3)            | 2.333(2)   |
| Li(1)-O(1)#2                                      | 1.969(5)   | Ca(1)-O(3)#5          | 2.333(2)   |
| Li(2)-O(2)#1                                      | 1.993(5)   | Ca(1)-O(1)            | 2.435(3)   |
| Li(2)-O(1)#6                                      | 2.050(3)   | Ca(1)-O(1)#10         | 2.435(3)   |
| Li(2)-O(1)#7                                      | 2.050(3)   | B(1)-O(2)             | 1.378(3)   |
| Li(2)-O(2)#3                                      | 2.172(5)   | B(1)-O(3)#9           | 1.387(3)   |
| Li(2)-O(3)#8                                      | 2.227(5)   | B(1)-O(1)             | 1.391(4)   |
| O(2)-Li(1)-O(2)#1                                 | 129.1(3)   | O(2)-Li(1)-O(3)       | 112.46(14) |
| O(2)#1-Li(1)-O(3)                                 | 112.46(14) | O(2)-Li(1)-O(1)#2     | 106.73(16) |
| O(2)#1-Li(1)-O(1)#2                               | 106.73(16) | O(3)-Li(1)-O(1)#2     | 75.05(18)  |
| O(2)#1-Li(2)-O(1)#6                               | 120.74(13) | O(2)#1-Li(2)-O(1)#7   | 120.74(13) |
| O(1)#6-Li(2)-O(1)#7                               | 116.6(2)   | O(2)#1-Li(2)-O(2)#3   | 92.5(2)    |
| O(1)#6-Li(2)-O(2)#3                               | 95.64(16)  | O(1)#7-Li(2)-O(2)#3   | 95.64(16)  |
| O(2)#1-Li(2)-O(3)#8                               | 68.57(18)  | O(1)#6-Li(2)-O(3)#8   | 94.25(17)  |
| O(1)#7-Li(2)-O(3)#8                               | 94.25(17)  | O(2)#3-Li(2)-O(3)#8   | 161.1(2)   |
| O(3)#10-Ca(1)-O(3)#11                             | 96.75(11)  | O(3)#10-Ca(1)-O(3)    | 180.0      |
| O(3)#11-Ca(1)-O(3)                                | 83.25(11)  | O(3)#10-Ca(1)-O(3)#5  | 83.25(11)  |
| O(3)#11-Ca(1)-O(3)#5                              | 180.0      | O(3)-Ca(1)-O(3)#5     | 96.75(11)  |
| O(3)#10-Ca(1)-O(1)                                | 82.25(8)   | O(3)#11-Ca(1)-O(1)    | 82.25(8)   |
| O(3)-Ca(1)-O(1)                                   | 97.75(8)   | O(3)#5-Ca(1)-O(1)     | 97.75(8)   |
| O(3)#10-Ca(1)-O(1)#10                             | 97.75(8)   | O(3)#11-Ca(1)-O(1)#10 | 97.75(8)   |
| O(3)-Ca(1)-O(1)#10                                | 82.25(8)   | O(3)#5-Ca(1)-O(1)#10  | 82.25(8)   |
| O(1)-Ca(1)-O(1)#10                                | 180.0      |                       |            |

Note. Symmetry transformations used to generate equivalent atoms:

|                             |                            |                            |
|-----------------------------|----------------------------|----------------------------|
| #1 $x, y, z-1$              | #2 $-x+1/2, y-1/2, -z+3/2$ | #3 $-x+1, -y, -z+1$        |
| #4 $-x+1, -y, -z$           | #5 $x, y, z+1$             | #6 $x+1/2, -y+1/2, z-1/2$  |
| #7 $x+1/2, -y+1/2, z-3/2$   | #8 $-x+1/2, y+1/2, -z+1/2$ | #9 $-x+1/2, y+1/2, -z+3/2$ |
| #10 $-x, -y, -z+2$          | #11 $-x, -y, -z+1$         | #12 $x-1/2, -y+1/2, z+3/2$ |
| #13 $-x+1/2, y-1/2, -z+1/2$ | #14 $x-1/2, -y+1/2, z+1/2$ |                            |

**Table S3.** Bond valence analysis of NaCa<sub>4</sub>B<sub>3</sub>O<sub>9</sub>, NaCaBO<sub>3</sub>, NaSrBO<sub>3</sub> and Li<sub>4</sub>CaB<sub>2</sub>O<sub>6</sub>.<sup>a,b</sup>

| Atoms                                             | l          | s     | Atoms         | l          | s     |
|---------------------------------------------------|------------|-------|---------------|------------|-------|
| <b>NaCa<sub>4</sub>B<sub>3</sub>O<sub>9</sub></b> |            |       |               |            |       |
| Ca(1)-O(2)                                        | 2.367(2)   | 0.339 | Ca(2)-O(4)    | 2.365(4)   | 0.341 |
| Ca(1)-O(2)#1                                      | 2.4060(19) | 0.305 | Ca(2)-O(5)    | 2.396(2)   | 0.314 |
| Ca(1)-O(4)#2                                      | 2.4298(7)  | 0.286 | Ca(2)-O(5)#4  | 2.396(2)   | 0.314 |
| Ca(1)-O(3)                                        | 2.435(2)   | 0.282 | Ca(2)-O(3)    | 2.4445(18) | 0.275 |
| Ca(1)-O(3)#5                                      | 2.4940(19) | 0.241 | Ca(2)-O(3)#4  | 2.4445(18) | 0.275 |
| Ca(1)-O(5)#3                                      | 2.433(2)   | 0.284 | Ca(2)-O(2)#7  | 2.6261(19) | 0.168 |
| Ca(1)-O(5)#4                                      | 2.448(2)   | 0.273 | Ca(2)-O(2)#1  | 2.6261(19) | 0.168 |
| Ca(1)-O(1)                                        | 2.5113(11) | 0.230 | Ca(2)-O(6)#5  | 2.8772(15) | 0.085 |
| $\sum s$                                          |            | 2.24  | Ca(2)-O(6)#6  | 2.8772(15) | 0.085 |
| Ca(3)-O(6)                                        | 2.345(3)   | 0.360 | $\sum s$      |            | 2.025 |
| Ca(3)-O(1)                                        | 2.404(3)   | 0.307 | Na(1) -O(1)   | 2.491(4)   | 0.156 |
| Ca(3)-O(2)#9                                      | 2.437(2)   | 0.281 | Na(1)-O(6)    | 2.784(4)   | 0.071 |
| Ca(3)-O(2)#10                                     | 2.437(2)   | 0.281 | Na(1)-O(3)#2  | 2.600(3)   | 0.116 |
| Ca(3)-O(5)#11                                     | 2.4443(17) | 0.275 | Na(1)-O(3)#14 | 2.600(3)   | 0.116 |
| Ca(3)-O(5)#3                                      | 2.4443(17) | 0.275 | Na(1)-O(4)#2  | 2.8323(11) | 0.062 |
| Ca(3)-O(3)                                        | 2.5552(19) | 0.204 | Na(1)-O(4)#15 | 2.8323(11) | 0.062 |
| Ca(3)-O(3)#12                                     | 2.5552(19) | 0.204 | Na(1)-O(2)#11 | 2.992(3)   | 0.040 |
| $\sum s$                                          |            | 2.187 | Na(1)-O(2)#3  | 2.992(3)   | 0.040 |
| B(1)-O(1)                                         | 1.360(6)   | 1.030 | $\sum s$      |            | 0.663 |
| B(1)-O(2)                                         | 1.387(3)   | 0.958 | B(3) - O(4)   | 1.360(6)   | 1.030 |
| B(1)-O(2)#12                                      | 1.387(3)   | 0.958 | B(3)-O(5)#16  | 1.370(3)   | 1.003 |
| $\sum s$                                          |            | 2.946 | B(3)-O(5)#10  | 1.370(3)   | 1.003 |
| B(2) - O(6)                                       | 1.349(6)   | 1.061 | $\sum s$      |            | 3.036 |
| B(2)-O(3)#11                                      | 1.400(3)   | 0.925 |               |            |       |
| B(2)-O(3)#3                                       | 1.400(3)   | 0.925 |               |            |       |
| $\sum s$                                          |            | 2.911 |               |            |       |
| <b>NaCaBO<sub>3</sub></b>                         |            |       |               |            |       |
| Ca(1)-O(4)                                        | 2.2266(17) | 0.496 | Ca(2)-O(1)    | 2.3443(13) | 0.361 |
| Ca(1)-O(4)#1                                      | 2.2266(17) | 0.496 | Ca(2)-O(4)    | 2.3618(9)  | 0.344 |
| Ca(1)-O(3)#2                                      | 2.3654(18) | 0.341 | Ca(2)-O(2)    | 2.4189(14) | 0.295 |
| Ca(1)-O(3)#3                                      | 2.3654(18) | 0.341 | Ca(2)-O(1)#7  | 2.4708(14) | 0.256 |
| Ca(1)-O(3)                                        | 2.3915(18) | 0.317 | Ca(2)-O(2)#4  | 2.4723(15) | 0.255 |
| Ca(1)-O(3)#1                                      | 2.3915(18) | 0.317 | Ca(2)-O(1)#8  | 2.5973(13) | 0.182 |
| $\sum s$                                          |            | 2.308 | Ca(2)-O(3)#3  | 2.6010(9)  | 0.180 |
| Na(2)-O(2)#9                                      | 2.4502(16) | 0.174 | $\sum s$      |            | 1.873 |
| Na(2)-O(2)                                        | 2.4502(16) | 0.174 | Na(3)-O(2)    | 2.2570(15) | 0.293 |
| Na(2)-O(2)#10                                     | 2.4502(16) | 0.174 | Na(3)-O(2)#9  | 2.2570(15) | 0.293 |

|                                                   |            |       |               |            |       |
|---------------------------------------------------|------------|-------|---------------|------------|-------|
| Na(2)-O(2)#11                                     | 2.4502(16) | 0.174 | Na(3)-O(1)#9  | 2.3945(15) | 0.202 |
| Na(2)-O(2)#13                                     | 3.028      | 0.036 | Na(3)-O(1)    | 2.3945(15) | 0.293 |
| Na(2)-O(2) #11                                    | 3.028      | 0.036 | Na(3)-O(1)#3  | 2.6673(16) | 0.097 |
| Na(2)-O(2)#16                                     | 3.028      | 0.036 | Na(3)-O(1)#13 | 2.6673(16) | 0.097 |
| Na(2)-O(2)#3                                      | 3.028      | 0.036 | $\Sigma s$    |            | 1.275 |
| $\Sigma s$                                        |            | 0.84  | B(2)-O(2)     | 1.3785(19) | 0.980 |
| B(1)-O(4)                                         | 1.368(3)   | 1.008 | B(2)-O(2)#10  | 1.3785(19) | 0.980 |
| B(1)-O(1)#8                                       | 1.3750(18) | 0.989 | B(2)-O(3)#3   | 1.382(3)   | 0.971 |
| B(1)-O(1)#14                                      | 1.3750(18) | 0.989 | $\Sigma s$    |            | 2.931 |
| $\Sigma s$                                        |            | 2.986 |               |            |       |
| <b>NaSrBO<sub>3</sub></b>                         |            |       |               |            |       |
| Sr(1)-O(2)#1                                      | 2.595(4)   | 0.275 | Na(1)-O(1)    | 2.285(4)   | 0.272 |
| Sr(1)-O(1)#2                                      | 2.603(4)   | 0.27  | Na(1)-O(3)    | 2.288(4)   | 0.270 |
| Sr(1)-O(3)#3                                      | 2.685(4)   | 0.216 | Na(1)-O(2)#2  | 2.314(4)   | 0.251 |
| Sr(1)-O(3)                                        | 2.718(4)   | 0.198 | Na(1)-O(3)#8  | 2.372(4)   | 0.214 |
| Sr(1)-O(3)#4                                      | 2.746(4)   | 0.183 | Na(1)-O(1)#9  | 2.375(4)   | 0.213 |
| Sr(1)-O(2)                                        | 2.750(4)   | 0.181 | Na(1)-O(2)#5  | 2.609(4)   | 0.113 |
| Sr(1)-O(1)#4                                      | 2.754(4)   | 0.179 | $\Sigma s$    |            | 1.333 |
| Sr(1)-O(2)#5                                      | 2.800(4)   | 0.158 | B(1)-O(1)#1   | 1.366(7)   | 1.014 |
| Sr(1)-O(1)                                        | 2.848(4)   | 0.139 | B(1)-O(2)     | 1.371(7)   | 1.001 |
| $\Sigma s$                                        |            | 1.799 | B(1)-O(3)#3   | 1.398(7)   | 0.930 |
|                                                   |            |       | $\Sigma s$    |            | 2.945 |
| <b>Li<sub>4</sub>CaB<sub>2</sub>O<sub>6</sub></b> |            |       |               |            |       |
| Li(1)-O(2)                                        | 1.931(3)   | 0.285 | Ca(1)-O(3)#10 | 2.333(2)   | 0.372 |
| Li(1)-O(2)#1                                      | 1.931(3)   | 0.285 | Ca(1)-O(3)#11 | 2.333(2)   | 0.372 |
| Li(1)-O(3)                                        | 1.965(5)   | 0.260 | Ca(1)-O(3)    | 2.333(2)   | 0.372 |
| Li(1)-O(1)#2                                      | 1.969(5)   | 0.257 | Ca(1)-O(3)#5  | 2.333(2)   | 0.372 |
| $\Sigma s$                                        |            | 1.087 | Ca(1)-O(1)    | 2.435(3)   | 0.282 |
| Li(2)-O(2)#1                                      | 1.993(5)   | 0.241 | Ca(1)-O(1)#10 | 2.435(3)   | 0.282 |
| Li(2)-O(1)#6                                      | 2.050(3)   | 0.206 | $\Sigma s$    |            | 2.052 |
| Li(2)-O(1)#7                                      | 2.050(3)   | 0.206 | B(1)-O(2)     | 1.378(3)   | 0.981 |
| Li(2)-O(2)#3                                      | 2.172(5)   | 0.148 | B(1)-O(3)#9   | 1.387(3)   | 0.958 |
| Li(2)-O(3)#8                                      | 2.227(5)   | 0.128 | B(1)-O(1)     | 1.391(4)   | 0.947 |
| $\Sigma s$                                        |            | 0.929 | $\Sigma s$    |            | 2.886 |

<sup>a</sup> Bond valences calculated with the program Bond Valence Calculator Version 2.00, Hormillosa, C., Healy, S., Stephen, T. McMaster University (1993).

<sup>b</sup> Valence sums calculated with the formula:  $S_i = \exp[(R_0 - R_i)/B]$ , where  $S_i$  = valence of bond "i" and  $B = 0.37$ . Superscripts indicate the number of equivalent bonds for anions.

**Table S4.** Dipole moment of NaCa<sub>4</sub>B<sub>3</sub>O<sub>9</sub> and NaCaBO<sub>3</sub>.

| NaCa <sub>4</sub> B <sub>3</sub> O <sub>9</sub> dipole moment |               |               |               |           |                                         |
|---------------------------------------------------------------|---------------|---------------|---------------|-----------|-----------------------------------------|
| species                                                       | x( <i>a</i> ) | y( <i>b</i> ) | z( <i>c</i> ) | magnitude |                                         |
|                                                               |               |               |               | debye     | ×10 <sup>-4</sup> esu·cm/Å <sup>3</sup> |
| B(1)O <sub>3</sub>                                            | 0.00          | -0.97         | 0.35          |           |                                         |
|                                                               | 0.00          | -0.97         | 0.35          |           |                                         |
|                                                               | 0.00          | 0.97          | 0.35          |           |                                         |
|                                                               | 0.00          | 0.97          | 0.35          |           |                                         |
| ε(B(1)O <sub>3</sub> )                                        | 0.00          | 0.00          | 1.40          | 1.40      | 17.96                                   |
| B(2)O <sub>3</sub>                                            | 0.00          | 0.08          | -1.44         |           |                                         |
|                                                               | 0.00          | 0.08          | -1.44         |           |                                         |
|                                                               | 0.00          | -0.08         | -1.44         |           |                                         |
|                                                               | 0.00          | -0.08         | -1.44         |           |                                         |
| ε(B(2)O <sub>3</sub> )                                        | 0.00          | 0.00          | -5.75         | 5.53      | 70.83                                   |
| B(3)O <sub>3</sub>                                            | 0.00          | 0.00          | 0.09          |           |                                         |
|                                                               | 0.00          | 0.00          | 0.09          |           |                                         |
|                                                               | 0.00          | 0.00          | 0.09          |           |                                         |
|                                                               | 0.00          | 0.00          | 0.09          |           |                                         |
| ε(B(3)O <sub>3</sub> )                                        | 0.00          | 0.00          | 0.38          | 0.38      | 4.85                                    |
| Na(1)O <sub>8</sub>                                           | 0.00          | 3.48          | 2.63          |           |                                         |
|                                                               | 0.00          | 3.48          | 2.63          |           |                                         |
|                                                               | 0.00          | -3.48         | 2.63          |           |                                         |
|                                                               | 0.00          | -3.48         | 2.63          |           |                                         |
| ε(Na(1)O <sub>8</sub> )                                       | 0.00          | 0.00          | 10.53         | 10.53     | 134.95                                  |
| Ca(1)O <sub>8</sub>                                           | 1.18          | 3.06          | -0.28         |           |                                         |
|                                                               | -1.18         | 3.06          | -0.28         |           |                                         |
|                                                               | 1.18          | -3.06         | -0.28         |           |                                         |
|                                                               | -1.18         | -3.06         | -0.28         |           |                                         |
|                                                               | 1.18          | 3.06          | -0.28         |           |                                         |
|                                                               | -1.18         | 3.06          | -0.28         |           |                                         |
|                                                               | 1.18          | -3.06         | -0.28         |           |                                         |
|                                                               | -1.18         | -3.06         | -0.28         |           |                                         |
| ε(Ca(1)O <sub>8</sub> )                                       | 0.00          | 0.00          | -2.27         | 2.23      | 28.62                                   |
| Ca(2)O <sub>9</sub>                                           | 0.00          | 0.00          | 5.46          |           |                                         |
|                                                               | 0.00          | 0.00          | 5.46          |           |                                         |
|                                                               | 0.00          | 0.00          | 5.46          |           |                                         |
|                                                               | 0.00          | 0.00          | 5.46          |           |                                         |
| ε(Ca(2)O <sub>9</sub> )                                       | 0.00          | 0.00          | 21.86         | 21.86     | 280.08                                  |
| Ca(3)O <sub>8</sub>                                           | 0.00          | -5.49         | -2.21         |           |                                         |

|                                    |      |       |       |      |        |
|------------------------------------|------|-------|-------|------|--------|
|                                    | 0.00 | 5.49  | -2.21 |      |        |
|                                    | 0.00 | -5.49 | -2.21 |      |        |
|                                    | 0.00 | 5.49  | -2.21 |      |        |
| $\epsilon(\text{Ca}(3)\text{O}_8)$ | 0.00 | 0.00  | -8.85 | 8.85 | 113.35 |
| Unit Cell                          | 0    | 0     | 17.30 |      |        |

| NaCaBO <sub>3</sub> dipole moment  |       |       |       |           |                                                          |
|------------------------------------|-------|-------|-------|-----------|----------------------------------------------------------|
| species                            | x(a)  | y(b)  | z(c)  | magnitude |                                                          |
|                                    |       |       |       | debye     | $\times 10^{-4} \text{esu} \cdot \text{cm}/\text{\AA}^3$ |
| B(1)O <sub>3</sub>                 | 0.00  | 0.31  | 1.40  |           |                                                          |
|                                    | 0.00  | -0.31 | 1.40  |           |                                                          |
|                                    | 0.00  | 0.31  | -1.40 |           |                                                          |
|                                    | 0.00  | -0.31 | -1.40 |           |                                                          |
| $\epsilon(\text{B}(1)\text{O}_3)$  | 0.00  | 0.00  | 0.00  | 0.00      | 0.00                                                     |
| B(2)O <sub>3</sub>                 | 0.34  | 0.00  | -0.41 |           | 0.00                                                     |
|                                    | -0.34 | 0.00  | -0.41 |           |                                                          |
|                                    | 0.34  | 0.00  | 0.41  |           |                                                          |
|                                    | -0.34 | 0.00  | 0.41  |           |                                                          |
| $\epsilon(\text{B}(2)\text{O}_3)$  | 0.00  | 0.00  | 0.00  | 0.00      | 0.00                                                     |
| Na(1)O <sub>6</sub>                | 0.00  | 5.97  | 2.18  |           |                                                          |
|                                    | 0.00  | -5.97 | 2.18  |           |                                                          |
|                                    | 0.00  | 5.97  | -2.18 |           |                                                          |
|                                    | 0.00  | -5.97 | -2.18 |           |                                                          |
| $\epsilon(\text{Na}(1)\text{O}_6)$ | 0.00  | 0.00  | 0.00  | 0.00      | 0.00                                                     |
| Na(2)O <sub>8</sub>                | 0.00  | 0.00  | -9.76 |           |                                                          |
|                                    | 0.00  | 0.00  | 9.76  |           |                                                          |
| $\epsilon(\text{Na}(2)\text{O}_8)$ | 0.00  | 0.00  | 0.00  | 0.00      | 0.00                                                     |
| Ca(1)O <sub>6</sub>                | 0.00  | 0.00  | 2.04  |           |                                                          |
|                                    | 0.00  | 0.00  | -2.04 |           |                                                          |
| $\epsilon(\text{Ca}(1)\text{O}_6)$ | 0.00  | 0.00  | 0.00  | 0.00      | 0.00                                                     |
| Ca(2)O <sub>7</sub>                | -1.98 | -0.81 | -1.02 |           |                                                          |
|                                    | 1.98  | -0.81 | -1.02 |           |                                                          |
|                                    | -1.98 | 0.81  | -1.02 |           |                                                          |
|                                    | 1.98  | 0.81  | -1.02 |           |                                                          |
|                                    | -1.98 | -0.81 | 1.02  |           |                                                          |
|                                    | 1.98  | -0.81 | 1.02  |           |                                                          |
|                                    | -1.98 | 0.81  | 1.02  |           |                                                          |
|                                    | 1.98  | 0.81  | 1.02  |           |                                                          |
| $\epsilon(\text{Ca}(2)\text{O}_7)$ | 0.00  | 0.00  | 0.00  | 0.00      | 0.00                                                     |
| Unit Cell                          | 0.00  | 0.00  | 0.00  | 0.00      | 0.00                                                     |

**Table S5.** State energies (eV) of the highest valence band (H-VB) and the lowest conduction band (L-CB) at same k-points of NaCa<sub>4</sub>B<sub>3</sub>O<sub>9</sub>, NaCaBO<sub>3</sub>, KCa<sub>4</sub>B<sub>3</sub>O<sub>9</sub> and KSr<sub>4</sub>B<sub>3</sub>O<sub>9</sub>.

| K-piont                                           | H-VB (eV) | L-CB (eV) |
|---------------------------------------------------|-----------|-----------|
| <b>NaCa<sub>4</sub>B<sub>3</sub>O<sub>9</sub></b> |           |           |
| Γ(0.000, 0.000, 0.000)                            | 0         | 4.17048   |
| Z (0.000, 0.000, 0.500)                           | -0.11341  | 4.79526   |
| T (-0.500,0.000, 0.000)                           | -0.12065  | 5.43394   |
| Y(-0.500,0.000, 0.000)                            | -0.00333  | 5.37046   |
| S (-0.500,0.500, 0.000)                           | -0.02354  | 4.66665   |
| X (0.000,0.500, 0.000)                            | -0.06551  | 4.94604   |
| U (0.000, 0.500, 0.500)                           | -0.10784  | 5.14019   |
| R (0.500, 0.500, 0.500)                           | -0.11797  | 4.68390   |
| <b>NaCaBO<sub>3</sub></b>                         |           |           |
| Γ(0.000, 0.000, 0.000)                            | 0         | 3.78088   |
| Z (0.000, 0.000, 0.500)                           | -0.14419  | 6.16210   |
| T (-0.500,0.000, 0.000)                           | -0.22984  | 6.20165   |
| Y(-0.500,0.000, 0.000)                            | -0.16456  | 4.25982   |
| S (-0.500,0.500, 0.000)                           | -0.17075  | 4.66665   |
| X (0.000,0.500, 0.000)                            | -0.17075  | 4.23522   |
| U (0.000, 0.500, 0.500)                           | -0.11484  | 5.30744   |
| R (0.500, 0.500, 0.500)                           | -0.15374  | 6.09875   |
| <b>KCa<sub>4</sub>B<sub>3</sub>O<sub>9</sub></b>  |           |           |
| Γ (0.000, 0.000, 0.000)                           | 0         | 4.37001   |
| Z (0.000, 0.000, 0.500)                           | -0.01650  | 4.71320   |
| T (-0.500,0.000, 0.000)                           | -0.07455  | 4.87639   |
| Y(-0.500,0.000, 0.000)                            | -0.03807  | 4.97568   |
| Γ (0.000,0.000, 0.000)                            | 0         | 4.37001   |
| S (-0.500,0.500, 0.000)                           | -0.07207  | 4.65136   |
| R (0.500, 0.500, 0.500)                           | -0.17070  | 4.67886   |
| Z (0.000, 0.000, 0.500)                           | -0.11316  | 4.71200   |
| <b>KSr<sub>4</sub>B<sub>3</sub>O<sub>9</sub></b>  |           |           |
| Γ(0.000, 0.000, 0.000)                            | 0         | 4.26006   |
| Z (0.000, 0.000, 0.500)                           | -0.05875  | 4.68503   |
| T (-0.500,0.000, 0.000)                           | -0.07738  | 4.95820   |
| Y(-0.500,0.000, 0.000)                            | -0.03807  | 4.99692   |
| Γ(0.000, 0.000, 0.000)                            | 0         | 4.26006   |
| S (-0.500,0.500, 0.000)                           | -0.04004  | 4.60431   |
| R (0.500, 0.500, 0.500)                           | -0.17593  | 4.66766   |
| Z (0.000, 0.000, 0.500)                           | -0.11263  | 4.68503   |
